# Supplementary material for: Glycine-modified polyamidoamine dendrimers: synthesis and structural characterization using nuclear magnetic resonance, ion-mobility mass spectrometry and capillary electrophoresis
Source: Royal Society of Chemistry journal article supplement (doi:10.1039/c3ra43939a), 2013-10-31
Supplement: c3ra43939a.pdf [file c3ra43939a.pdf]

## Supporting Information

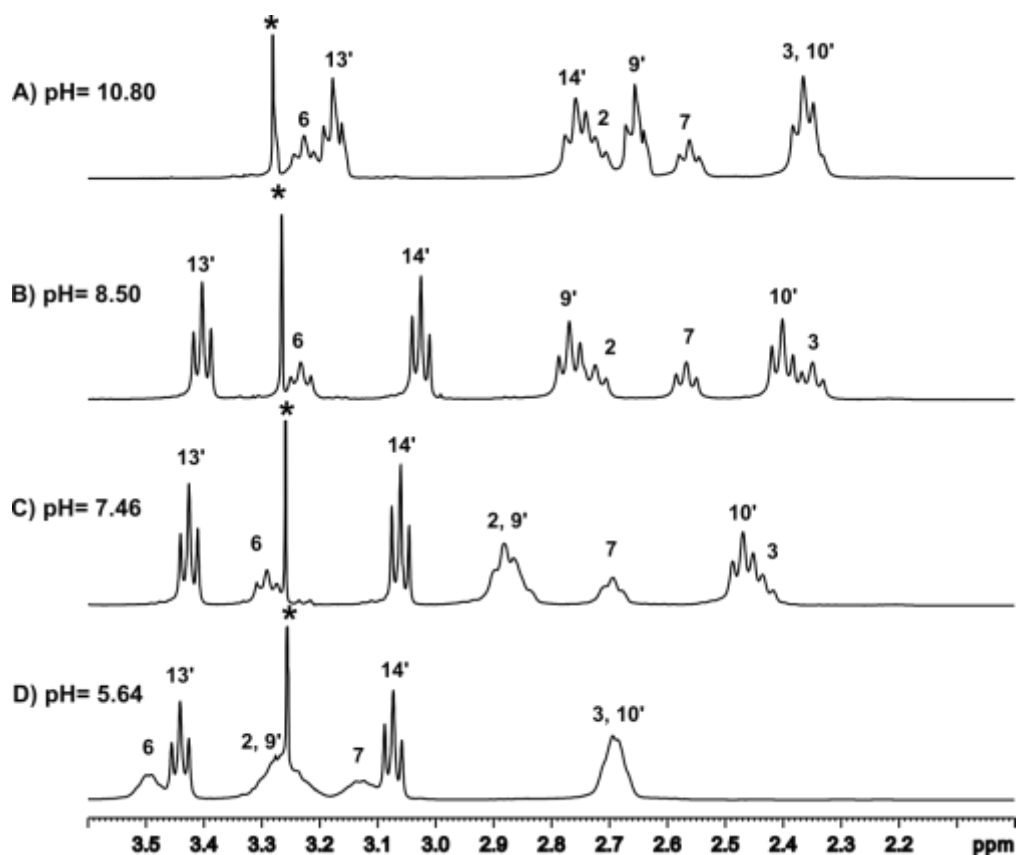

**Figure S1.** <sup>1</sup>H NMR spectra of unmodified PAMAM G1(N) at A) pH=10.80 B) pH=8.50 C) pH=7.46 and D) pH=5.64.  
\*residual EDA (ethylenediamine) from the second step procedure of PAMAM synthesis used as repeating unit.

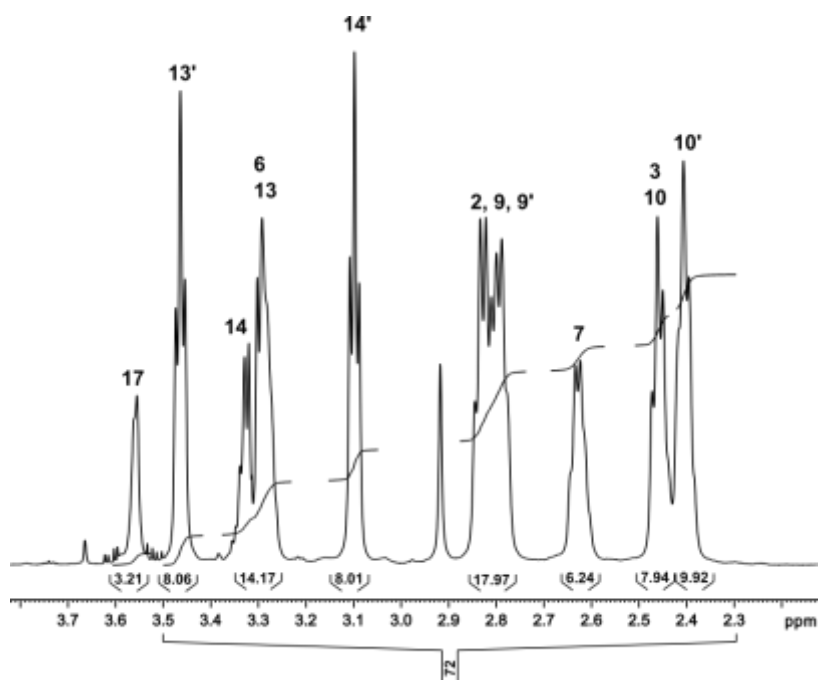

**Figure S2.** <sup>1</sup>H NMR spectrum of Gly<sub>n</sub>G1(N) with the integration ratio of methylene protons.

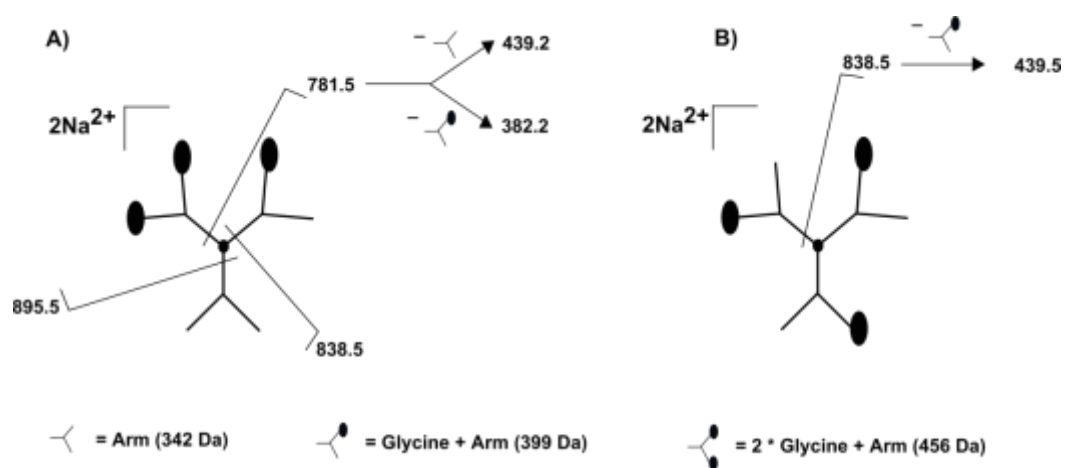

**Scheme S1.** Formation of the two isomeric structures of  $\text{Gly}_3\text{G1(N)}$  ( $[\text{M}+2\text{Na}]^{2+}$  at  $m/z$  630.1). The fragmentation pattern determined by ESI- $\text{MS}^n$  experiments is also reported.

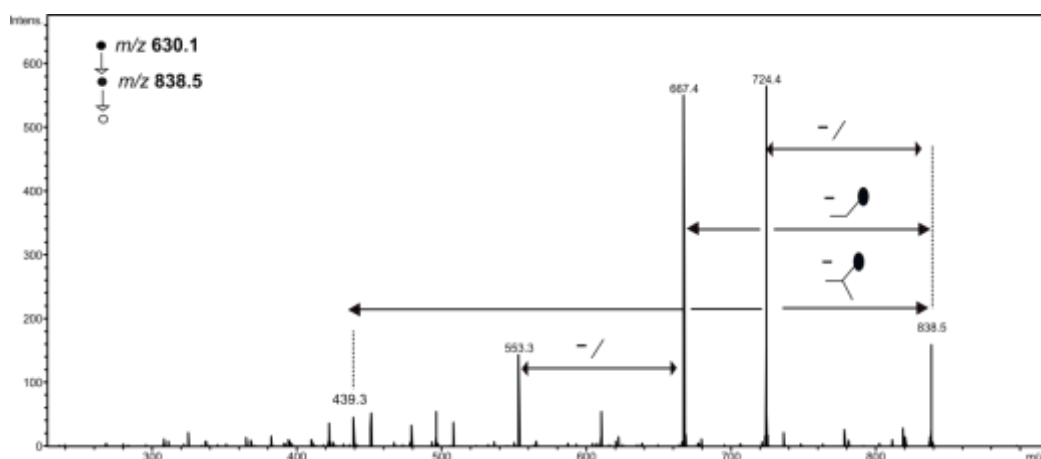

**Figure S3.** ESI-MS<sup>3</sup> mass spectrum of sodiated precursor ion of Gly<sub>3</sub>G1(N) isomer on scheme S1B.

**Table S1.** Percentage of grafted glycine estimated from IM-MS experiment: the integration of ion mobility peak are reported then corrected with the response factor estimated from the IM-MS analysis of equimolar G1(N) /Gly<sub>6</sub>G1(N) mixture.

| Number of grafted Glycine (n)                                                       | Peak area for [M+4H] <sup>4+</sup> |                             | Peak area for [M+3H] <sup>3+</sup> |                             | Peak area for [M+2H] <sup>2+</sup> |                             | Sum of the corrected areas (A <sub>i</sub> =A <sub>1</sub> +A <sub>2</sub> +A <sub>3</sub> ) | % of areas = A <sub>i</sub> / ΣA <sub>i</sub> | % of grafted Glycine = (A <sub>i</sub> /ΣA <sub>i</sub> )*(n/6) |
|-------------------------------------------------------------------------------------|------------------------------------|-----------------------------|------------------------------------|-----------------------------|------------------------------------|-----------------------------|----------------------------------------------------------------------------------------------|-----------------------------------------------|-----------------------------------------------------------------|
|                                                                                     | Measured                           | Corrected (A <sub>1</sub> ) | Measured                           | Corrected (A <sub>2</sub> ) | Measured                           | Corrected (A <sub>3</sub> ) |                                                                                              |                                               |                                                                 |
| 0                                                                                   | 29929                              | 375550                      | 94660                              | 409206                      | 36924                              | 189359                      | 974116                                                                                       | 27,9                                          | 0,0                                                             |
| 1                                                                                   | 67358                              | 554451                      | 101212                             | 342805                      | 46668                              | 182251                      | 1079508                                                                                      | 30,9                                          | 5,2                                                             |
| 2                                                                                   | 40357                              | 217923                      | 60550                              | 160682                      | 44051                              | 131001                      | 509606                                                                                       | 14,6                                          | 4,9                                                             |
| 3                                                                                   | 21443                              | 75956                       | 101432                             | 210896                      | 38779                              | 87819                       | 374672                                                                                       | 10,7                                          | 5,4                                                             |
| 4                                                                                   | 47857                              | 111206                      | 72085                              | 117429                      | 31088                              | 53610                       | 282246                                                                                       | 8,1                                           | 5,4                                                             |
| 5                                                                                   | 71247                              | 108607                      | 45022                              | 57464                       | 15601                              | 20488                       | 186559                                                                                       | 5,3                                           | 4,5                                                             |
| 6                                                                                   | 45462                              | 45462                       | 34390                              | 34389                       | 6698                               | 6698                        | 86549                                                                                        | 2,5                                           | 2,5                                                             |
| Sum of the A <sub>i</sub> areas = ΣA <sub>i</sub>                                   |                                    |                             |                                    |                             |                                    |                             | 3493256                                                                                      | 100,0                                         |                                                                 |
| Sum of percentage of grafted Glycine = Σ [(A <sub>i</sub> /ΣA <sub>i</sub> )*(n/6)] |                                    |                             |                                    |                             |                                    |                             |                                                                                              |                                               | <b>27,7</b>                                                     |
